# Supplementary material for: A system dynamics approach to understand Dutch adolescents’ sleep health using a causal loop diagram
Source: Springer Nature journal article supplement (doi:10.1186/s12966-024-01571-0), 2024-03-22
Supplement: MOESM5 [file 12966_2024_1571_MOESM5_ESM.pdf]

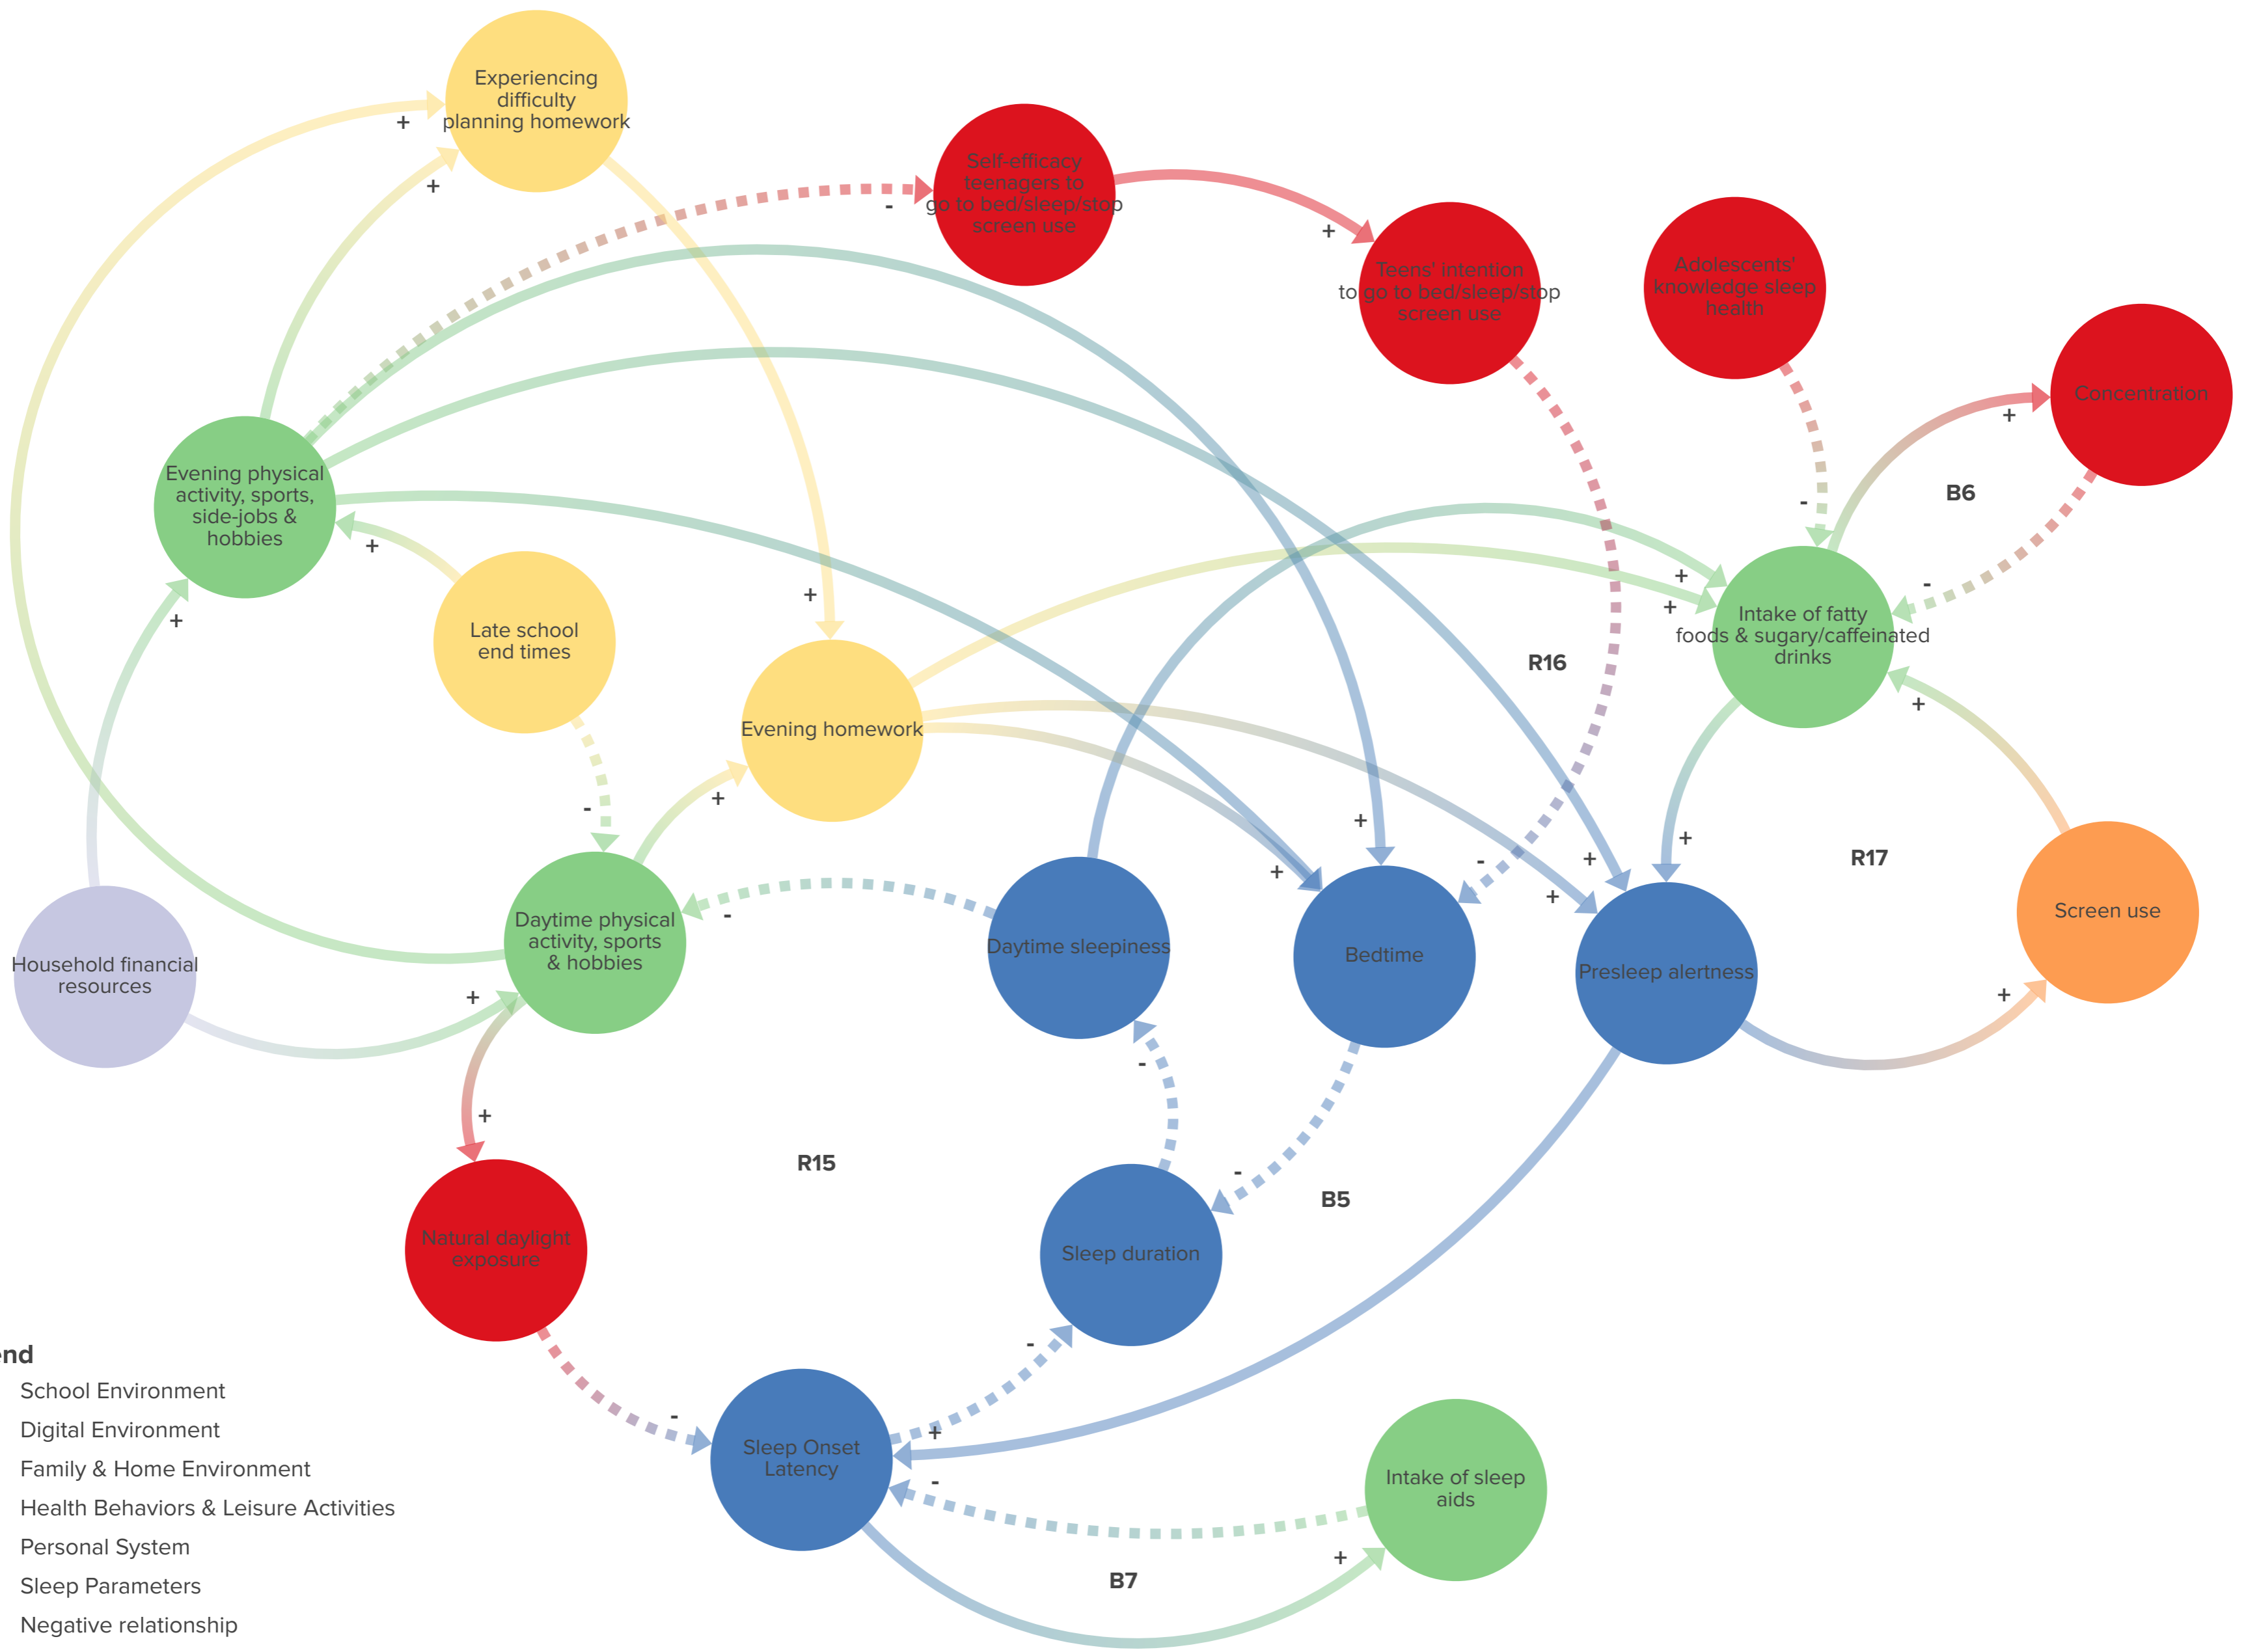

**Legend**

- School Environment
- Digital Environment
- Family & Home Environment
- Health Behaviors & Leisure Activities
- Personal System
- Sleep Parameters
- - - Negative relationship
- Positive relationship
